# Supplementary material
Source: Springer Nature journal article supplement (https://www.springermedizin.de/resource/supplementary/12885_2009_1978_MOESM1_ESM.pdf/9460228)

# Cell Line Survival

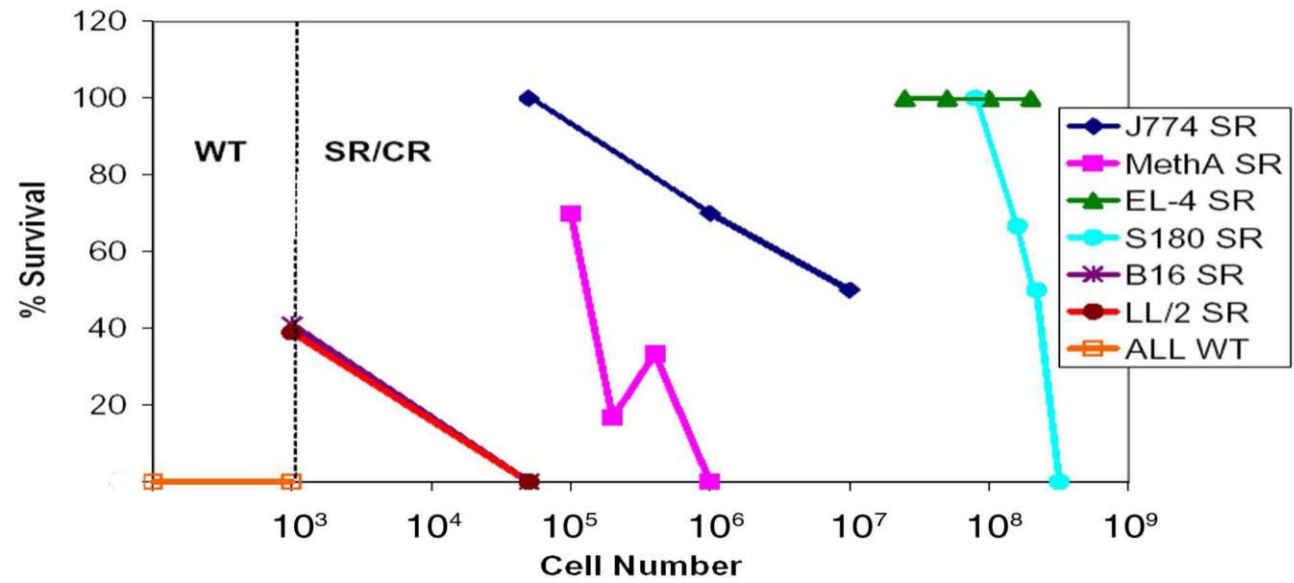

Supplement: MOESM1 [file 9460228]
